# Mitochondrial dynamics underlying thermal plasticity of cuttlefish (*Sepia officinalis*) hearts

Key words: Temperature sensitivity, cephalopod, evolutionary adaptation, thermal acclimation, proton leak, lactate and octopine dehydrogenase, respiration, systemic and branchial hearts, cardiac fibres

Michael Oellermann, Hans O. Pörtner, Felix C. Mark\*

Alfred Wegener Institute for Polar and Marine Research, 27570 Bremerhaven, Germany

\*Author for correspondence (e-mail: [Felix.Christopher.Mark@awi.de](mailto:Felix.Christopher.Mark@awi.de))

1 **ABSTRACT**

2 In the eurythermal cuttlefish *Sepia officinalis*, performance depends on hearts that ensure  
3 systemic oxygen supply over a broad range of temperatures. We therefore aimed to identify  
4 adjustments in energetic cardiac capacity and underlying mitochondrial function supporting  
5 thermal acclimation and adaptation that could be critical for the cuttlefish's competitive  
6 success in variable environments. Two genetically distinct cuttlefish populations were  
7 acclimated to 11°C, 16°C and 21°C, respectively. Subsequently, skinned and permeabilised  
8 heart fibres were used to assess mitochondrial functioning by means of high-resolution  
9 respirometry and a substrate-inhibitor protocol, followed by measurements of cardiac citrate  
10 synthase and cytosolic enzyme activities. Temperate English Channel cuttlefish had lower  
11 mitochondrial capacities but larger hearts than subtropical Adriatic cuttlefish. Warm  
12 acclimation to 21°C decreased mitochondrial complex I activity in Adriatic cuttlefish and  
13 increased complex IV activity in English Channel cuttlefish. However, compensation of  
14 mitochondrial capacities did not occur during cold acclimation to 11°C. In systemic hearts,  
15 thermal sensitivity of mitochondrial substrate oxidation was high for proline and pyruvate but  
16 low for succinate. Oxygen efficiency of catabolism rose from 11°C to 21°C via shifts to  
17 oxygen-conserving oxidation of proline and pyruvate and via reduced relative proton leak.  
18 The changes observed for substrate oxidation, mitochondrial complexes, relative proton leak  
19 or heart weights improve energetic efficiency and essentially seem to extend tolerance to high  
20 temperatures and reduce associated tissue hypoxia. We conclude that cuttlefish sustain cardiac  
21 performance and thus, systemic oxygen delivery over short and long-term changes of  
22 temperature and environmental conditions by multiple adjustments in cellular and  
23 mitochondrial energetics.

## 24 INTRODUCTION

25 The evolution of modern cephalopods was shaped by the rising competition with marine  
26 vertebrates and led to innovations that advance high levels of performance. Concomitant  
27 increases of energy demands required extant cephalopods to optimise supply and use of  
28 oxygen (O'Dor and Webber, 1986; O'Dor and Webber, 1991). As a result, cephalopods  
29 evolved high concentrations of blood pigment optimised for oxygen transport and a closed  
30 circulatory system driven by two branchial and one powerful systemic heart (Schipp, 1987;  
31 Wells and Smith, 1987; Wells, 1992; Pörtner and Zielinski, 1998). However, design  
32 constraints were involved, leading to locomotion by jet propulsion and comparatively low  
33 blood oxygen carrying capacities. Optimisation of performance led at least some cephalopod  
34 species to operate at their functional limits (O'Dor and Webber, 1986; Pörtner, 2002b).  
35 Environmental stressors such as fluctuations in ambient temperature or ambient hypoxia may  
36 be particularly challenging for the highly oxygen dependent cephalopods that face high  
37 competitive pressure (Rosa and Seibel, 2008).

38 Body functions of animals operate only within a certain thermal range and are set by  
39 ambient temperature for ectotherms. According to recent evidence, oxygen supply becomes  
40 limiting at high temperatures when oxygen demand increases due to limited functional  
41 capacities of the circulation and ventilation system to deliver oxygen (Pörtner and Knust,  
42 2007; Pörtner and Farrell, 2008). Adaptive adjustments of e.g. ventilatory musculature and  
43 heart rate or stroke volume are suitable to compensate for temperature induced impairments of  
44 oxygen supply (Wells, 1992; Frederich and Pörtner, 2000). These adjustments, however,  
45 involve changes in the capacity of mitochondria to provide sufficient aerobic energy to vital  
46 tissues like the heart (Pörtner, 2002a). Low temperatures also cause capacity limitations,  
47 which may involve insufficient release of oxygen to tissues by the blood pigment  
48 haemocyanin (Melzner et al., 2007b) and limited mitochondrial energy provision as required  
49 to power circulation or ventilation (Pörtner, 2002a).

50 Ectothermic hearts play a major role in defining limits of aerobic performance and thermal  
51 tolerance, as demonstrated by impaired cardiac function close to extreme temperatures or  
52 exercise levels (Farrell, 2002; Somero, 2010). In cephalopods, systemic hearts cover  
53 increased metabolic demands during either exercise or rising temperatures by a 2-3 fold  
54 increase of stroke volume or heartbeat frequency (Wells, 1992), but show limited  
55 performance at high critical temperatures, as indicated in *Sepia officinalis*, where blood  
56 perfusion fails to increase further beyond 23°C (Melzner et al., 2007a; Melzner et al., 2007b).

57 Yet, unlike in fishes, cephalopod systemic hearts receive well oxygenated blood and gain  
58 support by two accessory hearts, contractile blood vessels and mantle pressure oscillations  
59 (Schipp, 1987; Melzner et al., 2007a). Adversely, high blood viscosity, 2-3 fold lower blood  
60 oxygen carrying capacities and higher resting metabolic rates compared to haemoglobin  
61 bearing fish with a similar lifestyle (Wells, 1992; Pörtner, 1994) demand higher performance  
62 of the systemic heart. While cephalopod hearts are able to meet this workload within limits  
63 during acute rises of metabolic demand, it is unknown whether they adjust to seasonal (i.e.  
64 acclimation) or long term environmental changes over multiple generations (i.e. evolutionary  
65 adaptation). Such temperature acclimation or adaptation has been shown for fish hearts. Here,  
66 changes comprise increases in heart size (Goolish, 1987; Kent et al., 1988), increased  
67 mitochondrial content (Kleckner and Sidell, 1985; Johnston and Harrison, 1987; Kolok,  
68 1991), shifts from carbohydrate to fatty acid oxidation (Sephton and Driedzic, 1991; Sidell et  
69 al., 1995) or enhanced activities of enzymes essential in aerobic metabolism (Crockett and  
70 Sidell, 1990; Podrabsky et al., 2000), following cold-exposure. Yet, evidence for such  
71 temperature related adjustments is still lacking for cephalopod hearts.

72 The eurythermal common cuttlefish *Sepia officinalis* (Linnaeus 1758) lives on the  
73 continental shelf from the cold-temperate eastern North Atlantic to warm-subtropical  
74 Mediterranean and Atlantic waters off the Senegalese coast and follows a bottom dwelling,  
75 migratory life style on rocky to sandy grounds down to 200 m depth. Cuttlefish are rather  
76 sluggish, grow fast (up to two kg) and spawn after one or two years in shallow waters and die  
77 thereafter (Jereb and Roper, 2005). In this study, we compared a cuttlefish population from  
78 the English Channel living between 9°C and 17.5°C with a genetically distinct Mediterranean  
79 population (Wolfram et al., 2006) facing a range from 10°C to 25°C, respectively, between  
80 winter and summer (Boucaud-Camou and Boismery, 1991; Artegiani et al., 1997; Wang et al.,  
81 2003).

82 In this study, we aimed to understand how temperature changes affect the heart of the  
83 common cuttlefish *Sepia officinalis* by (1) exploring cardiac adjustments following long term  
84 genetic isolation in a temperate and subtropical habitat as well as (2) following thermal  
85 acclimation and (3) by investigating the thermal sensitivity of heart mitochondria.

## 86 MATERIAL AND METHODS

### 87 Experimental animals

88 Wild laid eggs of the European cuttlefish (*Sepia officinalis*) were collected from the  
89 temperate Oosterschelde lagoon, Netherlands (3°56'E, 51°35'N) and the subtropical Venetian  
90 lagoon close to Chioggia, Adria, Italy (12°18'E, 45°13'N). Populations from these localities  
91 form geographically distanced and genetically distinct clades without evidence of on-going  
92 genetic exchange (Wolfram et al., 2006; Perez-Losada et al., 2007). Thus, inter-population  
93 differences will most likely reflect evolutionary adaptation or genetic drift. About 300 eggs  
94 from five to six different egg masses (50 to 60 eggs per mass) were collected from a  
95 frequently visited spawning ground (>100 individuals per day) in the Oosterschelde lagoon  
96 and 200 eggs from more than ten egg masses were collected by scuba diving and snorkelling  
97 in the Venetian lagoon in 2008 and 2009. After transport to our institute individuals from each  
98 population were hatched and raised in separate tanks, connected to a re-circulating  
99 aquaculture system at constant temperature (mean  $\pm$  s.d., 15.9°C  $\pm$  0.1) at suitable stocking  
100 densities (Hanley et al., 1998) under constant 12 h dark:12 h light cycle. Hatchlings were fed  
101 daily with live shrimps (*Neomysis integer*, *Palaemonetes varians* and *Crangon crangon*) and  
102 after reaching a bigger size, exclusively with frozen brown shrimp (*Crangon crangon*). Water  
103 quality parameters were monitored weekly and kept at levels appropriate for cuttlefish culture  
104 (Hanley et al., 1998) (mean  $\pm$  s.d., O<sub>2</sub> = 10.07  $\pm$  0.43 mg l<sup>-1</sup>, pH = 8.05  $\pm$  0.02, salinity = 32.6  
105 psu  $\pm$  0.5, NH<sub>4</sub><sup>+</sup> < 0.2 mg l<sup>-1</sup>, NO<sub>2</sub><sup>-</sup> < 0.2 mg l<sup>-1</sup>, NO<sub>3</sub><sup>-</sup> < 80 mg l<sup>-1</sup>) by means of water  
106 treatment (protein skimmers, mechanical and biological filters, UV sterilisation) or water  
107 replacement.

108 After animal size had reached 30 - 40 g, each population was divided into three groups  
109 that were acclimated to 11°C, 16°C and 21°C from 8 to 22 weeks. These acclimation  
110 temperatures were selected to expose European cuttlefish to their seasonal and depth  
111 dependent temperature range, 10°C to 17.5°C for the English Channel population and 10°C to  
112 25°C for the Adriatic Sea population. Each group was kept in separate tanks connected to  
113 independent re-circulating systems for each temperature. Only animals showing normal  
114 behaviour without signs of illness (skin infections mostly due to jetting against tank walls)  
115 were selected for experiments. Although Adriatic cuttlefish weighed significantly more in the  
116 21°C group (Supplementary table S2) at the end of the acclimation period (possibly due to

117 enhanced growth rates), correlation analysis did not show clear evidence that weight  
118 differences obscured our data.

## 119 **Mitochondrial respiration**

### 120 *Dissection and muscle fibre preparation*

121 Animals were anesthetized in 3% ethanol until non-responsive before culling.  
122 Subsequently, total weight, mantle length, total length and sex were recorded. After opening  
123 the mantle cavity, samples of blood, gills and ink were taken and frozen for further  
124 experiments. The three hearts were excised starting with the branchial hearts and placed  
125 immediately into 1 ml ice-cold biopsy buffer (modified after (Kuznetsov et al., 2008)) to  
126 preserve mitochondrial function. The biopsy buffer contained (in mmol l<sup>-1</sup>, 2.77 CaK<sub>2</sub>EGTA,  
127 7.23 EGTA, 14.46 KOH, 5.77 Na<sub>2</sub>ATP, 6.56 MgCl<sub>2</sub>, 20 taurine, 20 imidazole, 0.5  
128 dithiothreitol (DTT), 50 MES, 588 sucrose, 252 glycine, pH 7.4 at 26°C, 1000 mosmol l<sup>-1</sup>).

129 After removal of non-cardiac tissues and weighing of all three hearts, approximately 50  
130 mg of systemic heart tissue were placed into a drop of biopsy buffer on a Petri dish on ice and  
131 then coarsely torn apart and dissected into small fibre bundles using two tweezers. The  
132 remainder of heart tissue and the branchial hearts were snap-frozen in liquid nitrogen and  
133 stored at -80°C for subsequent enzyme assays. Fibre bundles were immediately transferred to  
134 1 ml biopsy buffer in a 12 well multiwell culture plate and permeabilised with 50 µg ml<sup>-1</sup>  
135 saponin (Note: preliminary testing confirmed appropriate saponin concentration) by gentle  
136 mixing (115 rpm) on ice for 30 min. The fibres were then removed and washed three times for  
137 10 min in 2 ml ice-cold mitochondrial respiration medium (in mmol l<sup>-1</sup>, 50 HEPES, 25  
138 KH<sub>2</sub>PO<sub>4</sub>, 0.5 EGTA, 50 KCl, 50 NaCl, 10 MgCl<sub>2</sub>, 20 taurine, 50 lactobionate, 350 sucrose,  
139 150 glycine, 1 g l<sup>-1</sup> freshly added fatty acid free BSA, pH 7.4 at 22°C, 1000 mosmol l<sup>-1</sup>,  
140 modified after (Mommensen and Hochachka, 1981; Agnisola et al., 1991; Kuznetsov et al.,  
141 2008)) and stored in ice-cold respiration medium until use (protocol modified after (Saks et  
142 al., 1998)).

### 143 *Measurements of mitochondrial respiration*

144 Before each assay, fibres were blotted dry on chilled Whatman® paper, divided into two  
145 2-6 mg bundles and transferred to 2 ml duplicate chambers of an Oxygraph-2k respirometer  
146 (Oroboros Instruments, Innsbruck, Austria) containing air saturated respiration medium at the  
147 experimental temperature. Mitochondrial respiration was then measured online as background  
148 corrected weight specific oxygen consumption rate (pmol O<sub>2</sub> s<sup>-1</sup> mg<sup>-1</sup>, i.e. negative time

149 derivative of oxygen concentration) using DatLab analysis software (Oroboros Instruments,  
150 Innsbruck, Austria). Assays were performed consecutively at 11°C, 16°C and 21°C in  
151 randomised order. Chambers were washed with 96% ethanol and Milli-Q water to thoroughly  
152 remove inhibitors and substrates after each assay. To protect fibres from extreme oxygen  
153 levels, oxygen concentrations in chambers were kept between 80 nmol O<sub>2</sub> ml<sup>-1</sup> (maximum  
154 stimulated respiration remained stable down to 80 nmol O<sub>2</sub> ml<sup>-1</sup>) and air saturation (270-340  
155 nmol O<sub>2</sub> ml<sup>-1</sup>) by re-oxygenation with pure oxygen gas.

156 To assess mitochondrial function, respirometry on permeabilised skinned heart fibres was  
157 combined with a substrate-inhibitor protocol as follows. Mitochondria were first fuelled  
158 successively and in excess with the amino acid proline (5 mmol l<sup>-1</sup>), ADP (2.5 mmol l<sup>-1</sup>) as  
159 well as pyruvate (5 mmol l<sup>-1</sup>) and succinate (10 mmol l<sup>-1</sup>) in order to reach maximum coupled  
160 oxidative phosphorylation (i.e. state 3 respiration tied to ATP production). The choice of  
161 substrates corresponds to own tests and to previous studies that showed high rates of  
162 oxidation for proline, pyruvate and succinate in squid hearts (Ballantyne et al., 1981;  
163 Mommsen and Hochachka, 1981). In situ, cephalopod hearts derive pyruvate most evidently  
164 from blood glucose or oxidised octopine and proline from high intracellular stores (> 12 μmol  
165 g<sup>-1</sup>). Succinate can originate from both pyruvate derivatives and amino acids (e.g. ornithine,  
166 arginine, glutamate and proline) with the latter feeding into the Krebs cycle at the level of  
167 alpha-ketoglutarate (Ballantyne et al., 1981; Mommsen and Hochachka, 1981; Hochachka  
168 and Fields, 1982).

169 Integrity of mitochondrial membranes was tested by the addition of cytochrome c (0.01  
170 mmol l<sup>-1</sup>) that would stimulate respiration in case of damaged outer membranes. Proline  
171 stimulated respiration without ADP (state 2) provided an estimate of mitochondrial proton  
172 leak (Iftikar et al., 2010). Uncoupling of respiration from ATP production by  
173 carbonylcyanide-p-(trifluoromethyl) phenylhydrazone (FCCP, up to 2.5 μmol l<sup>-1</sup>) denoted  
174 maximum capacity of the electron transport chain. The loss of activity with rotenone (2.5  
175 μmol l<sup>-1</sup>) indicated NADH dehydrogenase (complex I) activity. The loss of activity with  
176 antimycin A (2.5 μmol l<sup>-1</sup>) quantified the non-mitochondrial background respiration.  
177 Cytochrome c oxidase (complex IV) activity was tested using the redox pair ascorbate (2  
178 mmol l<sup>-1</sup>) and N,N,N',N'- tetramethyl-p-phenylenediamine dihydrochloride (TMPD, 0.5  
179 mmol l<sup>-1</sup>, see list in supplementary table S1). Background auto-oxidation of the redox pair  
180 was determined for all experimental temperatures and subtracted from final results. Suitability  
181 and concentrations of substrates were tested beforehand. All chemicals were purchased from  
182 Sigma-Aldrich (Schnelldorf, Germany)



## 183 **Enzyme assays**

### 184 *Protein extraction and sample preparation*

185 To extract the protein, frozen heart tissue was ground by hand in a mortar filled with  
186 liquid nitrogen. The frozen tissue powder was then weighed and suspended in 10 volumes  
187 (w:v) of ice cold extraction buffer (50 mmol l<sup>-1</sup> Tris-HCl (pH 7.4 at 16°C), 1 mmol l<sup>-1</sup> EDTA,  
188 0.1% Triton X-100) and sonicated for 90 s at 0°C in a Branson Sonifier 450 (output control 8,  
189 Duty cycle 50%). Following two centrifugations for 10 min at 6000g and 4°C, supernatants  
190 were used for protein and enzyme assays. Pellets remaining after centrifugation were  
191 resuspended and re-extracted in ice cold extraction buffer to test for residual protein and  
192 citrate synthase activity.

193 For enzyme assays, samples were diluted 1:10 (v:v) with 75 mmol l<sup>-1</sup> Tris-HCl (pH 8.1 at  
194 16°C) and equilibrated to approximately 16°C using a temperature controlled metal block  
195 connected to a thermostat (Haake C25, Thermo Scientific, Karlsruhe, Germany) prior to each  
196 measurement. Absorbance was measured in triplicates using 96 well F-bottom microplates  
197 (Nunc GmbH & Co. KG, Wiesbaden, Germany), a multiplate reader (Fluostar Galaxy, BMG  
198 Labtechnologies, Offenburg, Germany) and analyzing software (FLUO 32, version 4.31 R5).

### 199 *Enzyme activities and protein content*

200 Citrate synthase (EC 4.1.3.7) activity was determined after Sidell et al. (1987) as the  
201 increase of absorbance at 412 nm by means of DTNB (5,5'-dithio-bis-(2-nitrobenzoic acid)).  
202 First, background deacylase activity was measured with 20 µl of diluted sample supernatant  
203 and 160 µl reaction mixture (in mmol l<sup>-1</sup>, 75 Tris-HCl, 0.25 DTNB, 0.4 acetyl~CoA, pH 8.1)  
204 followed by the addition of 20 µl 0.5 mmol l<sup>-1</sup> oxaloacetate to start the reaction. As DTNB  
205 reacts with sulphur groups (SH), dithiothreitol (DTT) was used as standard for the calculation  
206 of SH group turn-over.

207 Activities of octopine dehydrogenase (ODH, EC 1.5.1.11) and lactate dehydrogenase  
208 (LDH, EC 1.1.1.27) indicate capacities to form or recycle anaerobic end products in  
209 cephalopods (Grieshaber and Gäde, 1976; Storey, 1977; Storey and Storey, 1979). ODH and  
210 LDH activities were determined after Storey (1977) and Driedzic et al. (1990) as the decrease  
211 of absorbance at 340 nm. First, background activity was measured by combining 20 µl of  
212 diluted sample supernatant and 160 µl reaction mixture (in mmol l<sup>-1</sup>, 100 Tris-HCl (pH 7.0),  
213 0.45 NADH, 1 KCN, 10 arginine were added for quantifying the ODH reaction) followed by  
214 the addition of 20 µl 4 mmol l<sup>-1</sup> pyruvate to start the reaction. Final ODH activity was



215 determined by subtracting the LDH activity, which was measured simultaneously. NADH  
216 was used as a standard.

217 Enzyme activities were standardised to protein content determined after Bradford (1976).  
218 Sample supernatant and pellet homogenate were diluted 1:10 (v:v) with 0.9% NaCl. 5 µl were  
219 transferred to 250 µl Bradford dye reagent (0.1 mg ml<sup>-1</sup> Coomassie Brilliant Blue G-250, 5%  
220 ethanol, 8.5% H<sub>3</sub>PO<sub>4</sub>). After mixing and incubation for 10 min at room temperature (21°C),  
221 absorbance was recorded at 595 nm. Bovine albumin serum (BSA) was used as protein  
222 standard.

### 223 **Statistical analysis**

224 Statistical analysis was performed to spot significant differences ( $P < 0.05$ ) using SPSS  
225 (SPSS© Inc., version 14.0.1) by employing tests as followed: analysis of variance (ANOVA)  
226 or non-parametric tests; additional post-hoc Tukey or Hochberg's GT2 test for equal or  
227 unequal sample sizes respectively to compare acclimation treatments or assay temperatures;  
228 Pearson's correlation analysis to test for allometric effects; Kolmogorov-Smirnov and  
229 Levene's test assessed normality and homogeneity of variances, respectively. Data were  
230 expressed as means and the range of their 95% confidence interval if not stated otherwise.  
231 Outliers were detected using Nalimov's test ( $P < 0.01$ ) and excluded if justified. The  
232 temperature coefficient  $Q_{10}$  was calculated as follows:

$$Q_{10} = \left( \frac{R_2}{R_1} \right)^{\frac{10}{(T_2 - T_1)}}$$

233  $R$  denotes the respiratory rate at a higher ( $T_2$ ) or lower temperature ( $T_1$ ). Mitochondrial  
234 respiration was expressed per mg wet weight of blotted heart fibres.

## 235 RESULTS

### 236 Evolutionary Adaptation

237 Mitochondrial respiration differed clearly between the two genetically distinct cuttlefish  
238 populations. On average, cardiac mitochondria, fully fuelled by substrates and ADP (state 3),  
239 showed significantly higher respiration rates in Adriatic cuttlefish with  $41.1 \text{ pmol O}_2 \text{ s}^{-1} \text{ mg}^{-1}$   
240 (95% CI range from 37.3 to 44.9  $\text{pmol O}_2 \text{ s}^{-1} \text{ mg}^{-1}$ ) compared to only  $32.9 \text{ pmol O}_2 \text{ s}^{-1} \text{ mg}^{-1}$   
241 (30.0-35.9) as seen in English Channel cuttlefish (ANOVA,  $F(1, 128) = 11.92$ ,  $P < 0.01$ ,  
242 calculations based on entire pooled data set). These 20% higher cardiac aerobic capacities in  
243 cuttlefish from warmer waters were most pronounced at lower assay temperatures, and were  
244 mainly due to a higher contribution of pyruvate to overall respiration (average contribution of  
245  $15.2 \text{ pmol O}_2 \text{ s}^{-1} \text{ mg}^{-1}$ , (13.1-17.3)) for Adriatic cuttlefish compared to  $9.0 \text{ pmol O}_2 \text{ s}^{-1} \text{ mg}^{-1}$ ,  
246 (7.8-10.2) for English Channel cuttlefish, Figure 1). Consequently, fractions of pyruvate  
247 dependent respiration constituted 35.4% (32.8-38.0) in systemic hearts of Adriatic Sea but  
248 only 26.2% (24.1-28.3) in English Channel cuttlefish. Conversely, proline dependent fractions  
249 were higher (45.2% (42.5-47.8)) in English Channel- than in Adriatic Sea cuttlefish (35.2%  
250 (32.4-38.0)). Succinate dependent fractions were similar in the two populations.

251 While body weights did not differ between populations (ANOVA,  $F(1, 64) = 2.36$ ,  $P =$   
252  $0.13$ ), English Channel cuttlefish contained 43% heavier systemic and 38% heavier branchial  
253 hearts than Adriatic cuttlefish (systemic hearts: Kruskal-Wallis,  $H(1) = 13.69$ ,  $P < 0.01$ ;  
254 branchial hearts: Kruskal-Wallis,  $H(1) = 10.22$ ,  $P < 0.01$ , for raw data see supplementary  
255 table S2). Relative weights of systemic hearts constituted 0.083% (0.078-0.088) in English  
256 Channel and 0.059% (0.056-0.062) in Adriatic cuttlefish. Similarly, relative weights of  
257 branchial hearts constituted 0.047% (0.044-0.050) in English Channel and 0.039% (0.036-  
258 0.042) in Adriatic cuttlefish. As a result, respiration calculated for the whole systemic heart  
259 (state 3 respiration x heart weight) did not differ between populations (ANOVA,  $F(1, 41) =$   
260  $0.03$ ,  $P = 0.86$ ), due to the larger hearts in English Channel cuttlefish.

261 Further, systemic hearts of Adriatic cuttlefish showed partly higher protein specific  
262 enzyme activities compared to English Channel cuttlefish, which was most apparent for  
263 octopine dehydrogenase (Table 1). Enzyme activities of branchial hearts were similar between  
264 populations except for enhanced lactate dehydrogenase activities in English Channel  
265 cuttlefish acclimated to 11°C and 16°C (Table 1).

## 266 **Thermal acclimation**

267 Acclimation of cuttlefish to 11°C, 16°C and 21°C did not affect overall maximum state 3  
 268 respiration in the English Channel (ANOVA,  $F(2, 68) = 0.04$ ,  $P = 0.96$ ) and in the Adriatic  
 269 Sea populations (Kruskal-Wallis,  $H(2) = 0.94$ ,  $P = 0.63$ ) but caused minor shifts in substrate  
 270 dependent fractions (Figure 1) and slight changes in cardiac enzyme activities of English  
 271 Channel cuttlefish, shown by enhanced citrate synthase activities at 11°C and lower lactate  
 272 dehydrogenase activities at 21°C compared to animals acclimated to 16°C (Table 1). Also,  
 273 relative heart weights did not change with thermal acclimation for systemic- (ANOVA,  
 274 English Channel  $F(2, 29) = 0.50$ ,  $P = 0.61$ , Adriatic Sea  $F(2, 30) = 0.95$ ,  $P = 0.40$ ) and  
 275 branchial hearts (ANOVA, English Channel  $F(2, 29) = 0.46$ ,  $P = 0.64$ , Adriatic Sea  $F(2, 30)$   
 276  $= 3.0$ ,  $P = 0.07$ ).

277 Thermal acclimation affected the activity of mitochondrial complexes in systemic heart  
 278 fibres of cuttlefish. In this regard, Adriatic cuttlefish acclimated to 21°C showed between 10-  
 279 19% lower complex I activity compared to cuttlefish acclimated to 11°C and 16°C whereas  
 280 complex I activity in English Channel cuttlefish did not respond to thermal acclimation  
 281 (Figure 2A). In contrast, systemic hearts of English Channel cuttlefish contained  
 282 mitochondria that displayed increased complex IV activity following acclimation to 21°C, at  
 283 assay temperatures of 11°C and 21°C (Figure 2B). In Adriatic cuttlefish hearts, however,  
 284 complex IV activity remained unaffected by thermal acclimation but showed between 8-30%  
 285 higher enzyme activity at lower acclimation temperatures compared to English Channel  
 286 cuttlefish (Figure 2B).

## 287 **Thermal sensitivity of cardiac mitochondria**

288 In both cuttlefish populations cardiac mitochondria responded similarly to acute  
 289 temperature changes ranging from 11°C to 21°C. State 3 respiration increased from 20.4  
 290 (18.1-22.8) to 46.4 pmol O<sub>2</sub> s<sup>-1</sup> mg<sup>-1</sup> (42.9-49.9) in English Channel and from 27.8 (24.8-30.8)  
 291 to 51.2 pmol O<sub>2</sub> s<sup>-1</sup> mg<sup>-1</sup> (45.3-57.1) in Adriatic cuttlefish, with average Q<sub>10</sub> of 2.3 in English  
 292 Channel and 2.0 in Adriatic animals (Figure 3). Respiration resolved for substrates revealed a  
 293 high thermal sensitivity of proline- and pyruvate stimulated respiration but a low thermal  
 294 sensitivity of succinate stimulated respiration (Figure 3). This caused succinate to contribute  
 295 most to overall state 3 respiration at 11°C assay temperature (English Channel 40.4% (37.8-  
 296 43.0); Adriatic Sea 43.4% (39.6-47.2)) but to be a minor substrate at 21°C (English Channel  
 297 18.7% (15.9-21.5); Adriatic Sea 19.0% (16.0-22.0)). Conversely, proline and pyruvate

298 prevailed as oxidative substrates at 21°C assay temperature, whereas their fractions declined  
299 upon cooling towards 11°C (Figure 1).

300 Mitochondrial complexes displayed different temperature dependencies upon acute  
301 exposure. Similar to succinate stimulated respiration (which indicates activity of complex II)  
302 the activity of complex IV (indicated by respiration fuelled with ascorbate and TMPD)  
303 showed low thermal sensitivity (Figure 3).

304 Interestingly, although absolute leak rates increased with warmer assay temperatures up to  
305 21°C, mitochondrial proton leak relative to ADP stimulated respiration decreased in systemic  
306 hearts of English Channel cuttlefish and by trend in Adriatic cuttlefish upon warming (Figure  
307 4A, B). Outer membrane integrity, tested by cytochrome c addition, decreased with increasing  
308 assay temperatures in both cuttlefish populations (Figure 5). Further, English Channel  
309 cuttlefish showed more defective outer membranes and higher relative proton leak at 11°C  
310 assay temperature compared to Adriatic cuttlefish (Figure 5).

## 311 **DISCUSSION**

### 312 **Evolutionary adaptation**

313 There is strong evidence for evolutionary changes of heart function between the  
314 genetically distinct temperate and subtropical cuttlefish populations. Systemic hearts of  
315 temperate (English Channel) cuttlefish contained lower aerobic and partly lower anaerobic  
316 capacities (Figure 1 & Table 1) that may reduce their cardiac output and hence lower their  
317 ability to increase heart rates during exercise or elevated temperatures. Whether mitochondrial  
318 density parameters, enzyme numbers or specific enzyme activities accounted for the  
319 differential aerobic capacities remains to be resolved. Nevertheless, similar total heart  
320 respiration between populations showed that English Channel cuttlefish compensate for  
321 reduced respiratory capacities by larger hearts. Compensatory increases of heart weight are  
322 also common in teleost fish living at cooler temperatures (Foster et al., 1993; Driedzic et al.,  
323 1996). Larger hearts support pumping of larger blood volumes per stroke, thereby, they may  
324 compensate for low energetic capacities but also for rising blood viscosities at colder  
325 temperatures (Goolish, 1987; Driedzic et al., 1996). Thus, cuttlefish heart function in the cold  
326 may rather be sustained through an increase in organ size, than through an increase of cellular  
327 energetic capacities.

328 Furthermore, the findings of predominant oxidation of proline in systemic hearts of  
329 temperate cuttlefish but enhanced pyruvate oxidation in subtropical cuttlefish are well in line  
330 with findings for cold adapted fish that show suppressed carbohydrate metabolism but  
331 enhanced lipid oxidation (Crockett and Sidell, 1990; Sidell et al., 1995). Fuels like lipids and  
332 proline are less oxygen efficient than carbohydrates, which are generally favoured in  
333 cephalopods (Hochachka, 1994). Carbohydrate oxidation reduces oxygen consumption of the  
334 heart and threats from tissue hypoxia due to higher ATP yields per molecule of oxygen  
335 consumed (Higgins et al., 1980; Kahles et al., 1982; Hochachka, 1994). In cephalopod hearts,  
336 a mole of proline requires half a mole of dioxygen to oxidize it to glutamate before entering  
337 the Krebs cycle, thus decreasing its oxygen efficiency (Mommensen and Hochachka, 1981).  
338 Therefore, impaired oxygen supply at higher temperatures or environmental hypoxia, which  
339 cuttlefish face often in northern Adriatic lagoons (Diaz, 2001; Sorokin and Dallochio, 2008),  
340 may favour carbohydrates and thus, pyruvate as the more oxygen efficient substrate.

## 341 **Thermal acclimation**

### 342 *Substrate oxidation*

343 In cuttlefish hearts, thermal acclimation did not affect aerobic capacities (i.e. state 3  
344 respiration, Figure 1) and caused only minor changes of citrate synthase and lactate  
345 dehydrogenase activities in temperate cuttlefish (Table 1). At first glance, this contrasts with  
346 the thermal compensation found for English Channel cuttlefish. Here, routine metabolic rates  
347 of cuttlefish acclimated to 20°C fell below routine metabolic rates of individuals acclimated  
348 to 15°C, once above 20°C experimental temperature, thereby supporting an upward shift of  
349 limiting temperatures beyond 23°C (Melzner, 2005). This pattern of thermal acclimation may  
350 well be explained by a suppression of oxygen consumption rates in organs other than the  
351 hearts (e.g. hepatopancreas, mantle). Such a one-sided reduction of oxygen consumption in  
352 some tissues but concomitant maintenance of cardiac capacities may then free aerobic scope  
353 necessary to shift thermal tolerance upwards. On the other hand, in parallel to cardiac  
354 capacities, routine metabolic rates decline by 2-3.5 times from 20°C to 8°C to equally low  
355 levels irrespective of the acclimation mode (Melzner, 2005). As a result, cardiac as well as  
356 whole animal energetic capacities decline with decreasing temperatures and thus match a  
357 reduction of energy turnover during the cold season, marked by reduced growth rates of  
358 cuttlefish during winter (Le Goff and Daguzan, 1991).

### 359 *Mitochondrial complexes*

360 Effects of warm acclimation on mitochondrial complexes I and IV in systemic hearts of  
361 cuttlefish suggest modifications that delay heat-induced tissue hypoxia and formation of  
362 reactive oxygen species (ROS). Due to constraints on their systemic (i.e. low blood oxygen  
363 carrying capacity) and intracellular oxygen transport system (e.g. lack of intracellular oxygen  
364 delivering protein like myoglobin, (Hochachka, 1994)), cephalopods are chronically prone to  
365 facing critically low intracellular oxygen concentrations, particularly when high temperatures  
366 induce tissue hypoxia (Pörtner, 2001). Gnaiger et al. (1998) argued that an excess capacity of  
367 complex IV sustains high affinities for oxygen in mitochondria. Therefore, the increase of  
368 complex IV capacity in systemic hearts of English Channel cuttlefish following warm  
369 acclimation to 21°C (Figure 2B) likely enhanced oxygen affinity, thus supporting oxygen  
370 diffusion to mitochondria at high and hypoxia inducing temperatures. This response is in  
371 agreement with fishes that are capable to increase cardiac complex IV activity following  
372 warm-acclimation as seen in the highly hypoxia tolerant carp (Cai and Adelman, 1990) but  
373 also in cod (Foster et al., 1993) or in the liver of Antarctic eelpout (Windisch et al., 2011).

374 ROS formation in response to heat stress and environmental hypoxia is common among  
375 marine ectotherms (Abele et al., 2007), and may occur more often in the warm and often  
376 hypoxic lagoons of the northern Adriatic Sea during summer (Diaz, 2001; Sorokin et al.,  
377 2002) where cuttlefish are common (Rossetto, 2001). Complex I is one of the major sites of  
378 ROS production and has been related to cardiac failure (Ide et al., 1999; Sorescu and  
379 Griendling, 2002), therefore, a suppression of complex I capacity following warm-  
380 acclimation in Adriatic cuttlefish (Figure 2A) may reduce heat and hypoxia related ROS  
381 formation to preserve mitochondrial function. As a corollary, changed activities of  
382 mitochondrial complexes following warm acclimation may serve cuttlefish to reduce  
383 temperature induced hypoxia or harmful oxygen stress in cardiac tissues.

## 384 **Thermal sensitivity of cardiac mitochondria**

### 385 *Substrate oxidation*

386 During summer, cuttlefish pass a steep thermocline during their daily vertical migration  
387 with possible temperature changes of up to 2°C per m (e.g. Adriatic Sea: 23°C to 14°C down  
388 to 80 m; English Channel: 19°C to 11°C down to 40 m) (Artegiani et al., 1997; Sharples et al.,  
389 2001). Our findings demonstrate that noticeable increases of mitochondrial respiration (state  
390 3) from 11°C to 21°C support systemic hearts of cuttlefish to operate aerobically over this  
391 range of temperatures. Interestingly, various substrates contributed differently to this thermal  
392 response (Figure 3). The substrate dependent effect on thermal sensitivity of oxidative  
393 pathways may allow mitochondria to produce aerobic energy over a broader range of  
394 temperatures. While less temperature sensitive pathways (e.g. that augment succinate)  
395 attenuate a rapid decline of mitochondrial respiration (i.e. ATP provision) at low  
396 temperatures, thermally more sensitive pathways (e.g. fuelled by pyruvate or proline)  
397 complement less responsive pathways at higher temperatures to match enhanced ATP  
398 demands of the heart. Although pyruvate and proline oxidation declines at low temperatures,  
399 *in situ* supply of succinate may be sustained by amino acids such as glutamate, ornithine or  
400 arginine that are well oxidized and readily available from the blood or intracellular stores  
401 (Ballantyne et al., 1981; Mommsen and Hochachka, 1981; Hochachka and Fields, 1982;  
402 Mommsen et al., 1983). Observations in fish hearts support this pattern, as fatty acid  
403 oxidation has mostly lower or at least different thermal sensitivities than carbohydrate  
404 oxidation, which kicks in in the warmth (Sephton et al., 1990; Sephton and Driedzic, 1991).

405 The predominance of pyruvate and proline oxidation at higher temperatures (Figure 1)  
406 improves oxygen efficient production of ATP and likely reduces the threat of tissue hypoxia.



407 After entering mitochondria, proline is oxidized to glutamate and then enters the Krebs cycle  
408 via alpha-ketoglutarate and yields 4-5 NADH and 1 FADH<sub>2</sub> (i.e. assuming no diffusive loss of  
409 products), similar to pyruvate that yields 4 NADH and 1 FADH<sub>2</sub> during its oxidation via the  
410 citric acid cycle (Storey and Storey, 1983). As a consequence, proline and pyruvate feed about  
411 80% of their electrons into complex I and thus produce more ATP per mole of oxygen  
412 consumed. In contrast, succinate yields 1 NADH and 1 FADH<sub>2</sub> and thus, diverts only 50% of  
413 its electrons to complex I when fully catabolized to oxaloacetate. Oxygen efficient ATP  
414 production may be advantageous at high temperatures when oxygen becomes limiting  
415 ((Pörtner, 2010) for recent review) and is well in line with the general trend of modifications  
416 in substrate use by mitochondria that enhance oxygen efficiency in cephalopods (Hochachka,  
417 1994).

#### 418 *Membrane leakiness and integrity*

419 Surprisingly, in cuttlefish hearts, relative proton leak decreased and outer membrane  
420 integrity increased (i.e. shown by decreased stimulation of respiration by cytochrome c) up to  
421 a temperature close to the whole animal critical temperature of 23°C ((Melzner et al., 2007b),  
422 Figure 4, 5). In contrast to the present observation, relative proton leak increases with  
423 temperature in mitochondria isolated from hearts, red muscle and liver of fish (Hardewig et  
424 al., 1999; Fangue et al., 2009; Hilton et al., 2010), gills of Antarctic bivalves (Pörtner et al.,  
425 1999) or the body wall of a lugworm (Sommer and Pörtner, 2002). Our finding thus contrasts  
426 with the general view that higher temperatures increase membrane fluidity and thus proton  
427 leak (Hazel, 1995; Pörtner, 2001). This could be explained by a decrease of mitochondrial  
428 membrane potential via increased ATP synthase activity relative to electron flux through the  
429 electron transport system, which would induce reduced proton gradients over the membrane  
430 leading to reduced proton leak (Nicholls, 2004). Alternatively, structural changes of  
431 mitochondrial membranes that reduce membrane permeability may have occurred, as  
432 indicated by reduced respiratory stimulation by cytochrome c (Figure 5), which passes the  
433 outer membrane by diffusion only (Gellerich et al., 2000). Such evident changes of the outer  
434 membrane permeability likely affected the inner mitochondrial membrane too and hence  
435 supported the observed decline of relative proton leak with rising temperatures. Even though  
436 the underlying mechanisms remain unclear, decreasing relative proton leak with acutely rising  
437 temperature aids cuttlefish hearts to be more oxygen efficient and thereby shift temperatures  
438 that entail oxygen deficiency to higher tolerated values. These functional characteristics may  
439 be adaptive in supporting eurythermy of this species.

440 Interestingly, temperate English Channel cuttlefish mitochondria displayed lower  
441 respiratory capacities and contained more permeable and therefore less efficient membranes at  
442 11°C assay temperature than the subtropical Adriatic cuttlefish (Figure 4, 5). Their  
443 mitochondria operate thus less efficient and more “costly” at cool temperatures. Conversely, a  
444 higher “futile cycling” through proton leak would make them more responsive to sudden  
445 increases in workloads. This may be needed less in warm acclimated hearts.

## 446 **Conclusion**

447 Our study about cuttlefish heart fibres and their mitochondria revealed inherent potential  
448 to cope with thermal challenges faced during an individual’s lifetime, but also genetic  
449 plasticity between populations relevant for adaptation to long-term environmental change.  
450 Most modifications improve cardiac efficiency and extend tolerance to high temperatures and  
451 associated hypoxemic conditions. Cold compensation on evolutionary time scales occurs via a  
452 shift in substrate and enhanced proton leak as a sign of enhanced futile cycling in  
453 mitochondrial metabolism. Lack of cold compensation by adjusting mitochondrial or enzyme  
454 capacities during cold acclimation, on the other hand, suggest decreased cardiac energetic  
455 capacities during the cold season. Overall, we conclude that the observed flexibility of cardiac  
456 function, based on specific cephalopod-type characteristics, assures cardiac power output and  
457 systemic oxygen delivery at various temperatures. It thus conforms to the capacity of *Sepia*  
458 *officinalis* to tolerate a broad range of temperatures and supports their ability to contend with  
459 fishes - their prime competitors - in rapidly changing environments.

460 **LIST OF SYMBOLS AND ABBREVIATIONS**

|     |                 |                                                          |
|-----|-----------------|----------------------------------------------------------|
| 461 | ATP             | Adenosin-5'-triphosphate                                 |
| 462 | BSA             | Bovine Serum Albumin                                     |
| 463 | Complex I       | NADH dehydrogenase                                       |
| 464 | Complex IV      | Cytochrome c oxidase                                     |
| 465 | DTNB            | 5,5'-dithio-bis-(2-nitro-benzoic acid)                   |
| 466 | DTT             | Dithiothreitol                                           |
| 467 | EDTA            | Ethylenediaminetetraacetic acid                          |
| 468 | EGTA            | Ethylene glycol tetraacetic acid                         |
| 469 | HEPES           | N-(2-Hydroxyethyl)piperazine-N'-(2-ethanesulfonic acid)  |
| 470 | LDH             | Lactate dehydrogenase                                    |
| 471 | ODH             | Octopine dehydrogenase                                   |
| 472 | Q <sub>10</sub> | Temperature coefficient                                  |
| 473 | ROS             | Reactive oxygen species                                  |
| 474 | TMPD            | N,N,N',N'-tetramethyl-p-phenylenediamine dihydrochloride |

475 **ACKNOWLEDGEMENTS**

476 We would like to thank Guido Krieten, Fredy Veliz Moraleda, Timo Hirse and Nils  
477 Koschnick for technical support, Anne Thonig for conducting parts of the experiments as well  
478 as colleagues for constant support and advice. Special thanks to Anthony J. R. Hickey  
479 (University of Auckland) for his technical and theoretical training to apply the skinned fibre  
480 technique. We further would like to thank the two anonymous reviewers for their many  
481 helpful comments and suggestions on an earlier version of this manuscript.

482 **FUNDING**

483       This study was supported by the Alfred Wegener Institute for Polar and Marine Research  
484 and is a contribution to Natural Environment Research Council Grant  
485 NERC/A/S/2002/00812.

## 486 FIGURES LEGENDS

487 Figure 1: Maximum state 3 respiration ( $\text{pmol O}_2 \text{ s}^{-1} \text{ mg}^{-1}$ ) resolved for each substrate,  
488 after addition of ADP, at 11°C, 16°C and 21°C assay temperature in comparison  
489 between acclimation treatments ( $N = 5-11$ ) as well as between cuttlefish from (A) the  
490 English Channel and (B) Adriatic Sea. Significant differences ( $P < 0.05$ ) between  
491 acclimation groups are marked by asterisks and for total state 3 respiration between  
492 populations by roofs. Values are means  $\pm$  95% C.I..

493  
494 Figure 2: Effects of thermal acclimation on mitochondrial complex I / NADH  
495 dehydrogenase (A, relative decrease (%) of uncoupled respiration following rotenone  
496 addition) and complex IV / cytochrome c oxidase activity (B, respiration ( $\text{pmol O}_2 \text{ s}^{-1}$   
497  $\text{mg}^{-1}$ ) after addition of ascorbate and TMPD) in systemic hearts of cuttlefish from the  
498 English Channel and Adriatic Sea. Significant differences ( $P < 0.05$ ) between  
499 acclimation temperatures ( $N=5-11$ ) are marked by asterisks and between populations  
500 by roofs.

501  
502 Figure 3: Temperature coefficients ( $Q_{10}$ , means  $\pm$  95% C.I.) of cardiac mitochondrial  
503 respiration from 11°C to 21°C, resolved for each substrate and for total state 3 and  
504 complex IV respiration. As there were no differences between acclimations, data  
505 were pooled for each case.  $Q_{10}$  of pyruvate and succinate are based on stimulating  
506 respiration.

507  
508 Figure 4: Change of proline stimulated respiration without ADP (denoted as proton  
509 leak) and with ADP ( $\text{pmol O}_2 \text{ s}^{-1} \text{ mg}^{-1}$ ) and relative proton leak (% , calculated as  
510 fraction of leak rates relative to coupled respiration with ADP) from 11°C to 21°C  
511 assay temperature in systemic hearts, in comparison between (A) English Channel  
512 ( $N=24$ ) and (B) Adriatic ( $N=19-20$ ) cuttlefish. Due to the lack of differences between  
513 acclimation treatments, data were pooled for each assay temperature and  
514 population. Values are means  $\pm$  95% C.I. Significant differences ( $P < 0.05$ ) between  
515 assay temperatures for relative proton leak are marked by unequal letters of the  
516 same case and between populations by roofs.

517

518 Figure 5: Relative change of maximum state 3 respiration (%) following cytochrome c  
519 addition, from 11°C to 21°C assay temperature in systemic hearts, in comparison  
520 between English Channel ( $N=23-24$ ) and Adriatic ( $N=19-20$ ) cuttlefish. Due to the  
521 lack of differences between acclimation treatments, data were pooled for each assay  
522 temperature and population. Values are means  $\pm$  95% C.I.. Significant differences ( $P$   
523  $< 0.05$ ) between assay temperatures are marked by unequal letters of the same case  
524 and between populations by roofs.

525

526 Table 1: Enzyme activities ( $\mu\text{mol min}^{-1} \text{mg protein}^{-1}$ , at 16°C) of (A) citrate synthase,  
527 (B) lactate dehydrogenase and (C) octopine dehydrogenase of cuttlefish systemic  
528 and branchial hearts, in comparison between thermal acclimations, as well as  
529 between English Channel and Adriatic Sea populations.



530 **REFERENCES**

- 531 **Abele, D., Philipp, E., Gonzalez, P. and Puntarulo, S.** (2007). Marine invertebrate  
532 mitochondria and oxidative stress. *Front. Biosci.* **12**, 933-946.
- 533 **Agnisola, C., Driedzic, W. R., Foster, A. R., Houlihan, D. F. and Stewart, J. M.** (1991).  
534 Oxygen consumption, carbon dioxide production and enzyme activities of isolated  
535 working Octopus heart. *J. Exp. Biol.* **157**, 543-549.
- 536 **Artegiani, A., Paschini, E., Russo, A., Bregant, D., Raicich, F. and Pinardi, N.** (1997).  
537 The Adriatic Sea general circulation. Part I: Air-sea interactions and water mass  
538 structure. *J. Phys. Oceanogr.* **27**, 1492-1514.
- 539 **Ballantyne, J., Hochachka, P. and Mommsen, T.** (1981). Studies on the metabolism of the  
540 migratory squid, *Loligo opalescens*: enzymes of tissues and heart mitochondria. *Mar.*  
541 *Biol. Lett* **2**, 75-85.
- 542 **Boucaud-Camou, E. and Boismery, J.** (1991). The migrations of the cuttlefish (*Sepia*  
543 *officinalis* L.) in the English Channel. In *Acta of the 1st International Symposium on*  
544 *the Cuttlefish Sepia*, (ed. E. Boucaud-Camou), pp. 179-189. Caen: Université de Caen  
545 Publications.
- 546 **Bradford, M.** (1976). A rapid and sensitive method for the quantitation of microgram  
547 quantities of protein utilizing the principle of protein-dye binding. *Anal. Biochem.* **72**,  
548 248-254.
- 549 **Cai, Y. J. and Adelman, I. R.** (1990). Temperature acclimation in respiratory and  
550 cytochrome c oxidase activity in common carp (*Cyprinus carpio*). *Comp. Biochem.*  
551 *Physiol. A Physiol.* **95**, 139-144.
- 552 **Crockett, E. and Sidell, B.** (1990). Some pathways of energy metabolism are cold adapted in  
553 Antarctic fishes. *Physiol. Zool.* **63**, 472-488.
- 554 **Diaz, R. J.** (2001). Overview of hypoxia around the world. *J. Environ. Qual.* **30**, 275-281.
- 555 **Driedzic, W., Bailey, J. and Sephton, D.** (1996). Cardiac adaptations to low temperature in  
556 non-polar teleost fish. *J. Exp. Zool.* **275**, 186-195.
- 557 **Driedzic, W., Sidell, B., Stewart, J. and Johnston, I.** (1990). Maximal activities of enzymes  
558 of energy metabolism in cephalopod systemic and branchial hearts. *Physiol. Zool.* **63**,  
559 615-629.
- 560 **Fangue, N., Richards, J. and Schulte, P.** (2009). Do mitochondrial properties explain  
561 intraspecific variation in thermal tolerance? *J. Exp. Biol.* **212**, 514-522.

- 562 **Farrell, A. P.** (2002). Cardiorespiratory performance in salmonids during exercise at high  
563 temperature: insights into cardiovascular design limitations in fishes. *Comp. Biochem.*  
564 *Physiol. Part A Mol. Integr. Physiol.* **132**, 797-810.
- 565 **Foster, A., Hall, S. and Houlihan, D.** (1993). The effects of temperature acclimation on  
566 organ/tissue mass and cytochrome c oxidase activity in juvenile cod (*Gadus morhua*).  
567 *J. Fish Biol.* **42**, 947-957.
- 568 **Frederich, M. and Pörtner, H. O.** (2000). Oxygen limitation of thermal tolerance defined by  
569 cardiac and ventilatory performance in spider crab, *Maja squinado*. *Am. J. Physiol.*  
570 *Regul. Integr. Comp. Physiol.* **279**, R1531-R1538
- 571 **Gellerich, F., Trumbeckaite, S., Opalka, J., Seppet, E., Rasmussen, H. N., Neuhoff, C.**  
572 **and Zierz, S.** (2000). Function of the mitochondrial outer membrane as a diffusion  
573 barrier in health and diseases. *Biochem. Soc. Trans.* **28**, 164-169.
- 574 **Gnaiger, E., Lassnig, B., Kuznetsov, A., Rieger, G. and Margreiter, R.** (1998).  
575 Mitochondrial oxygen affinity, respiratory flux control and excess capacity of  
576 cytochrome c oxidase. *J. Exp. Biol.* **201**, 1129-1139.
- 577 **Goolish, E.** (1987). Cold-acclimation increases the ventricle size of carp, *Cyprinus carpio*. *J.*  
578 *Therm. Biol.* **12**, 203-205.
- 579 **Grieshaber, M. and Gäde, G.** (1976). The biological role of octopine in the squid, *Loligo*  
580 *vulgaris* (Lamarck). *J. Comp. Physiol. B Biochem. Syst. Environ. Physiol.* **108**, 225-  
581 232.
- 582 **Hanley, J. S., Shashar, N., Smolowitz, R., Bullis, R. A., Mebane, W. N., Gabr, H. R. and**  
583 **Hanlon, R. T.** (1998). Modified laboratory culture techniques for the European  
584 cuttlefish *Sepia officinalis*. *Biol. Bull. (Woods Hole)* **195**, 223-225.
- 585 **Hardewig, I., Pörtner, H. O. and Peck, L. S.** (1999). Thermal sensitivity of mitochondrial  
586 function in the Antarctic Notothenioid *Lepidonotothen nudifrons*. *J. Comp. Physiol. B*  
587 *Biochem. Syst. Environ. Physiol.* **169**, 597-604.
- 588 **Hazel, J. R.** (1995). Thermal adaptation in biological membranes: is homeoviscous  
589 adaptation the explanation? *Annu. Rev. Physiol.* **57**, 19-42.
- 590 **Higgins, A., Morville, M., Burges, R., Gardiner, D., Page, M. and Blackburn, K.** (1980).  
591 Oxfenicine diverts rat muscle metabolism from fatty acid to carbohydrate oxidation  
592 and protects the ischaemic rat heart. *Life Sci.* **27**, 963-970.
- 593 **Hilton, Z., Clements, K. D. and Hickey, A. J. R.** (2010). Temperature sensitivity of cardiac  
594 mitochondria in intertidal and subtidal triplefin fishes. *J. Comp. Physiol. B Biochem.*  
595 *Syst. Environ. Physiol.* **180**, 979-990.

- 596 **Hochachka, P.** (1994). Oxygen efficient design of cephalopod muscle metabolism. *Mar.*  
597 *Freshw. Behav. Physiol.* **25**, 61-67.
- 598 **Hochachka, P. W. and Fields, J. H. A.** (1982). Arginine, glutamate, and proline as  
599 substrates for oxidation and for glycogenesis in cephalopod tissues. *Pac. Sci.* **36**, 325-  
600 335.
- 601 **Ide, T., Tsutsui, H., Kinugawa, S., Utsumi, H., Kang, D., Hattori, N., Uchida, K.,**  
602 **Arimura, K., Egashira, K. and Takeshita, A.** (1999). Mitochondrial electron  
603 transport complex I is a potential source of oxygen free radicals in the failing  
604 myocardium. *Circ. Res.* **85**, 357-363.
- 605 **Iftikar, F. I., MacDonald, J. and Hickey, A. J. R.** (2010). Thermal limits of portunid crab  
606 heart mitochondria: Could more thermo-stable mitochondria advantage invasive  
607 species? *J. Exp. Mar. Biol. Ecol.* **395**, 232-239.
- 608 **Jereb, P. and Roper, C. F. E.** (2005). Cephalopods of the World. An annotated and  
609 illustrated catalogue of species known to date. In *FAO Species Catalogue for Fishery*  
610 *Purposes* vol. 1 (ed. F.A.O.), pp. 1-277. Rome.
- 611 **Johnston, I. and Harrison, P.** (1987). Morphometrics and ultrastructure of myocardial tissue  
612 in Notothenioid fishes. *Fish Physiol. Biochem.* **3**, 1-6.
- 613 **Kahles, H., Hellige, G., Hunneman, D., Mezger, V. A. and Bretschneider, H.** (1982).  
614 Influence of myocardial substrate utilization on the oxygen consumption of the heart.  
615 *Clin. Cardiol.* **5**, 286-293.
- 616 **Kent, J., Koban, M. and Prosser, C.** (1988). Cold-acclimation-induced protein hypertrophy  
617 in channel catfish and green sunfish. *J. Comp. Physiol. B Biochem. Syst. Environ.*  
618 *Physiol.* **158**, 185-198.
- 619 **Kleckner, N. and Sidell, B.** (1985). Comparison of maximal activities of enzymes from  
620 tissues of thermally acclimated and naturally acclimatized chain pickerel (*Esox niger*).  
621 *Physiol. Zool.* **58**, 18-28.
- 622 **Kolok, A. S.** (1991). Temperature compensation in two centrarchid fishes: Do winter-  
623 quiescent fish undergo cellular temperature compensation? *Trans. Am. Fish. Soc.* **120**,  
624 52-57.
- 625 **Kuznetsov, A. V., Veksler, V., Gellerich, F. N., Saks, V., Margreiter, R. and Kunz, W. S.**  
626 (2008). Analysis of mitochondrial function in situ in permeabilized muscle fibers,  
627 tissues and cells. *Nat. Protoc.* **3**, 965-976.
- 628 **Le Goff, R. and Daguzan, J.** (1991). Growth and life cycles of the cuttlefish *Sepia officinalis*  
629 L. (Mollusca: Cephalopoda) in south Brittany (France). *Bull. Mar. Sci.* **49**, 341-348.

- 630 **Melzner, F.** (2005). Systemic investigations on the physiology of temperature tolerance in the  
631 common cuttlefish *Sepia officinalis*. In *Alfred Wegener Institute for Polar and Marine*  
632 *Research*, vol. PhD, pp. 234. Bremerhaven: University of Bremen.
- 633 **Melzner, F., Bock, C. and Pörtner, H. O.** (2007a). Coordination between ventilatory  
634 pressure oscillations and venous return in the cephalopod *Sepia officinalis* under  
635 control conditions, spontaneous exercise and recovery. *J. Comp. Physiol. B Biochem.*  
636 *Syst. Environ. Physiol.* **177**, 1-17.
- 637 **Melzner, F., Mark, F. C. and Pörtner, H. O.** (2007b). Role of blood-oxygen transport in  
638 thermal tolerance of the cuttlefish, *Sepia officinalis*. *Integr. Comp. Biol.* **47**, 645-655.
- 639 **Mommsen, T. P. and Hochachka, P. W.** (1981). Respiratory and enzymatic properties of  
640 squid heart mitochondria. *Eur. J. Biochem.* **120**, 345-350.
- 641 **Mommsen, T. P., Hochachka, P. W. and French, C. J.** (1983). Metabolism of arginine,  
642 proline, and ornithine in tissues of the squid, *Illex illecebrosus*. *Can. J. Zool.* **61**, 1835-  
643 1846.
- 644 **Nicholls, D. G.** (2004). Mitochondrial membrane potential and aging. *Aging Cell* **3**, 35-40.
- 645 **O'Dor, R. K. and Webber, D. M.** (1986). The constraints on cephalopods: why squid aren't  
646 fish. *Can. J. Zool.* **64**, 1591-1605.
- 647 **O'Dor, R. K. and Webber, D. M.** (1991). Invertebrate athletes: trade-offs between transport  
648 efficiency and power density in cephalopod evolution. *J. Exp. Biol.* **160**, 93-112.
- 649 **Perez-Losada, M., Nolte, M. J., Crandall, K. A. and Shaw, P. W.** (2007). Testing  
650 hypotheses of population structuring in the Northeast Atlantic Ocean and  
651 Mediterranean Sea using the common cuttlefish *Sepia officinalis*. *Mol. Ecol.* **16**, 2667-  
652 2679.
- 653 **Podrabsky, J. E., Javillonar, C., Hand, S. C. and Crawford, D. L.** (2000). Intraspecific  
654 variation in aerobic metabolism and glycolytic enzyme expression in heart ventricles.  
655 *Am. J. Physiol. Regul. Integr. Comp. Physiol.* **279**, R2344-R2348
- 656 **Pörtner, H. O.** (1994). Coordination of metabolism, acid-base regulation and haemocyanin  
657 function in cephalopods. *Mar. Behav. Physiol.* **25**, 131-148.
- 658 **Pörtner, H. O.** (2001). Climate change and temperature-dependent biogeography: oxygen  
659 limitation of thermal tolerance in animals. *Naturwissenschaften* **88**, 137-146.
- 660 **Pörtner, H. O.** (2002a). Climate variations and the physiological basis of temperature  
661 dependent biogeography: systemic to molecular hierarchy of thermal tolerance in  
662 animals. *Comp. Biochem. Physiol. Part A Mol. Integr. Physiol.* **132**, 739-761.

- 663 **Pörtner, H. O.** (2002b). Environmental and functional limits to muscular exercise and body  
664 size in marine invertebrate athletes. *Comp. Biochem. Physiol. Part A Mol. Integr.*  
665 *Physiol.* **133**, 303-321.
- 666 **Pörtner, H. O.** (2010). Oxygen-and capacity-limitation of thermal tolerance: a matrix for  
667 integrating climate-related stressor effects in marine ecosystems. *J. Exp. Biol.* **213**,  
668 881.
- 669 **Pörtner, H. O. and Zielinski, S.** (1998). Environmental constraints and the physiology of  
670 performance in squids. *S. Afr. J. Mar. Sci.* **20**, 207-221.
- 671 **Pörtner, H. O. and Knust, R.** (2007). Climate Change Affects Marine Fishes Through the  
672 Oxygen Limitation of Thermal Tolerance. *Science* **315**, 95-97.
- 673 **Pörtner, H. O. and Farrell, A. P.** (2008). Ecology. Physiology and climate change. *Science*  
674 **322**, 690-692.
- 675 **Pörtner, H. O., Hardewig, I. and Peck, L. S.** (1999). Mitochondrial function and critical  
676 temperature in the Antarctic bivalve, *Laternula elliptica*. *Comp. Biochem. Physiol.*  
677 *Part A Mol. Integr. Physiol.* **124**, 179-189.
- 678 **Rosa, R. and Seibel, B. A.** (2008). Synergistic effects of climate-related variables suggest  
679 future physiological impairment in a top oceanic predator. *Proc. Natl. Acad. Sci. USA*  
680 **105**, 20776–20780.
- 681 **Rossetto, L.** ( 2001). The Management of Fishery in the Lagoon of Venice. In *IIFET2000*,  
682 pp. 1-10. Corvallis: International Institute of Fisheries Economics and Trade, Oregon  
683 State University.
- 684 **Saks, V. A., Veksler, V. I., Kuznetsov, A. V., Kay, L., Sikk, P., Tiivel, T., Tranqui, L.,**  
685 **Olivares, J., Winkler, K. and Wiedemann, F.** (1998). Permeabilized cell and  
686 skinned fiber techniques in studies of mitochondrial function in vitro. *Mol. Cell.*  
687 *Biochem.* **184**, 81-100.
- 688 **Schipp, R.** (1987). General morphological and functional characteristics of the cephalopod  
689 circulatory system. An introduction. *Cell. Mol. Life Sci.* **43**, 474-477.
- 690 **Sephton, D. and Driedzic, W.** (1991). Effect of acute and chronic temperature transition on  
691 enzymes of cardiac metabolism in white perch (*Morone americana*), yellow perch  
692 (*Perca flavescens*), and smallmouth bass (*Micropterus dolomieu*). *Can. J. Zool.* **69**,  
693 258-262.
- 694 **Sephton, D., Bailey, J. and Driedzic, W.** (1990). Impact of acute temperature transition on  
695 enzyme activity levels, oxygen consumption, and exogenous fuel utilization in sea

696 raven (*Hemitripterus americanus*) hearts. *J. Comp. Physiol. B Biochem. Syst. Environ.*  
697 *Physiol.* **160**, 511-518.

698 **Sharples, J., Moore, C. M., Rippeth, T. P., Holligan, P. M., Hydes, D. J., Fisher, N. R.**  
699 **and Simpson, J. H.** (2001). Phytoplankton distribution and survival in the  
700 thermocline. *Limnol. Oceanogr.* **46**, 486-496.

701 **Sidell, B., Crockett, E. and Driedzic, W.** (1995). Antarctic fish tissues preferentially  
702 catabolize monoenoic fatty acids. *J. Exp. Zool.* **271**, 73-81.

703 **Sidell, B., Driedzic, W., Stowe, D. and Johnston, I.** (1987). Biochemical correlations of  
704 power development and metabolic fuel preferenda in fish hearts. *Physiol. Zool.* **60**,  
705 221-232.

706 **Somero, G. N.** (2010). The physiology of climate change: how potentials for acclimatization  
707 and genetic adaptation will determine ‘winners’ and ‘losers’. *J. Exp. Biol.* **213**, 912-  
708 920.

709 **Sommer, A. M. and Pörtner, H. O.** (2002). Metabolic cold adaptation in the lugworm  
710 *Arenicola marina*: comparison of a North Sea and a White Sea population. *Mar. Ecol.*  
711 *Prog. Ser.* **240**, 171-182.

712 **Sorescu, D. and Griendling, K. K.** (2002). Reactive oxygen species, mitochondria, and  
713 NAD(P)H oxidases in the development and progression of heart failure. *Congest.*  
714 *Heart Fail.* **8**, 132-140.

715 **Sorokin, P. Y., Sorokin, Y. I., Zakuskina, O. Y. and Ravagnan, G. P.** (2002). On the  
716 changing ecology of Venice lagoon. *Hydrobiologia* **487**, 1-18.

717 **Sorokin, Y. I. and Dallochio, F.** (2008). Dynamics of phosphorus in the Venice lagoon  
718 during a picocyanobacteria bloom. *J. Plankton Res.* **30**, 1019-1026.

719 **Storey, K.** (1977). Tissue specific isozymes of octopine dehydrogenase in the cuttlefish,  
720 *Sepia officinalis*. The roles of octopine dehydrogenase and lactate dehydrogenase in  
721 *Sepia*. *J. Comp. Physiol. B Biochem. Syst. Environ. Physiol.* **115**, 159-169.

722 **Storey, K. B. and Storey, J. M.** (1979). Octopine metabolism in the cuttlefish, *Sepia*  
723 *officinalis*, octopine production by muscle and its role as an aerobic substrate for non-  
724 muscular tissues. *J. Comp. Physiol. B Biochem. Syst. Environ. Physiol.* **131**, 311-319.

725 **Storey, K. B. and Storey, J. M.** (1983). Carbohydrate metabolism in cephalopod molluscs.  
726 In *The Mollusca: Metabolic biochemistry and molecular biomechanics*, vol. 1 (ed. P.  
727 W. Hochachka), pp. 91–136. New York: Academic Press.

728 **Wang, J., Pierce, G. J., Boyle, P. R., Denis, V., Robin, J. P. and Bellido, J. M.** (2003).  
729 Spatial and temporal patterns of cuttlefish (*Sepia officinalis*) abundance and



730 environmental influences - A case study using trawl fishery data in French Atlantic  
731 coastal, English Channel, and adjacent waters. *ICES J. Mar. Sci.* **60**, 1149-1158.

732 **Wells, M.** (1992). The cephalopod heart: The evolution of a high-performance invertebrate  
733 pump. *Cell. Mol. Life Sci.* **48**, 800-808.

734 **Wells, M. and Smith, P.** (1987). The performance of the octopus circulatory system: a  
735 triumph of engineering over design. *Cell. Mol. Life Sci.* **43**, 487-499.

736 **Windisch, H. S., Kathover, R., Portner, H. O., Frickenhaus, S. and Lucassen, M.** (2011).  
737 Thermal acclimation in Antarctic fish: transcriptomic profiling of metabolic pathways.  
738 *Am. J. Physiol. Regul. Integr. Comp. Physiol.* **301**, R1453-1466.

739 **Wolfram, K., Mark, F. C., John, U., Lucassen, M. and Portner, H. O.** (2006).  
740 Microsatellite DNA variation indicates low levels of genetic differentiation among  
741 cuttlefish (*Sepia officinalis* L.) populations in the English Channel and the Bay of  
742 Biscay. *Comp Biochem Phys D* **1**, 375-383.

743

744



Figures

Figure 1

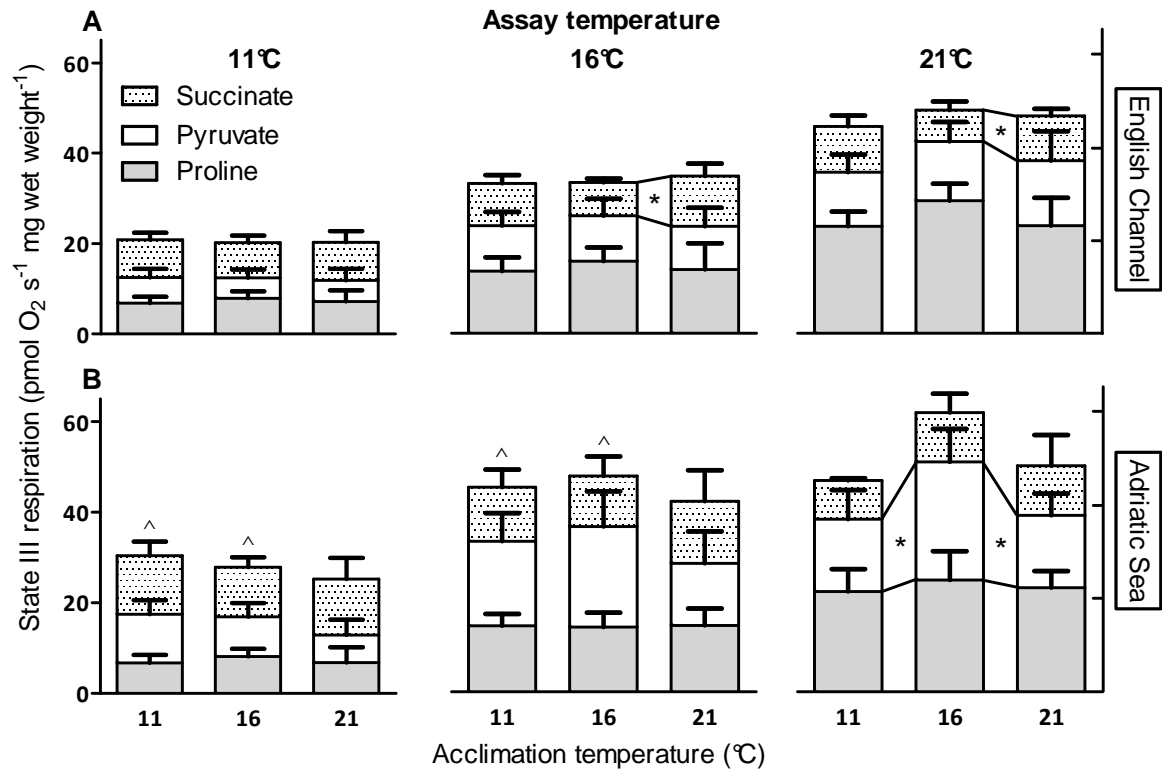

Figure 2

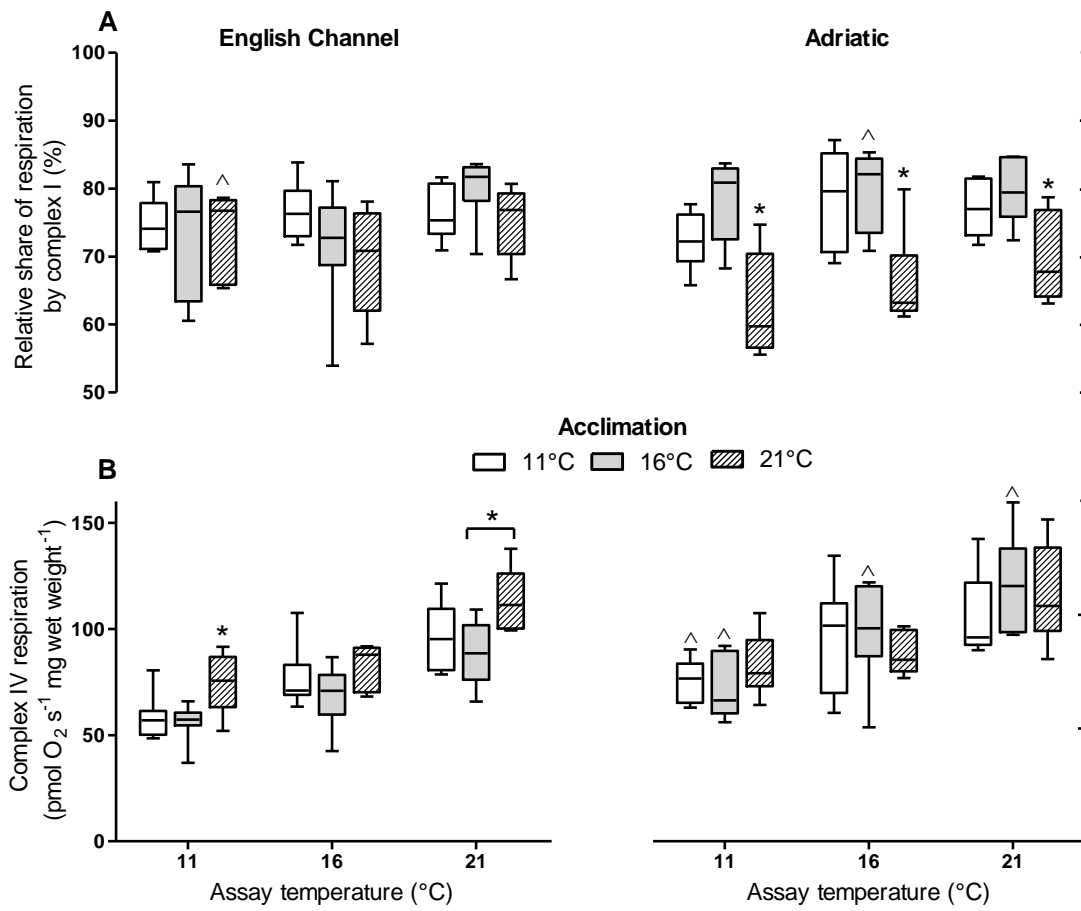

Figure 3

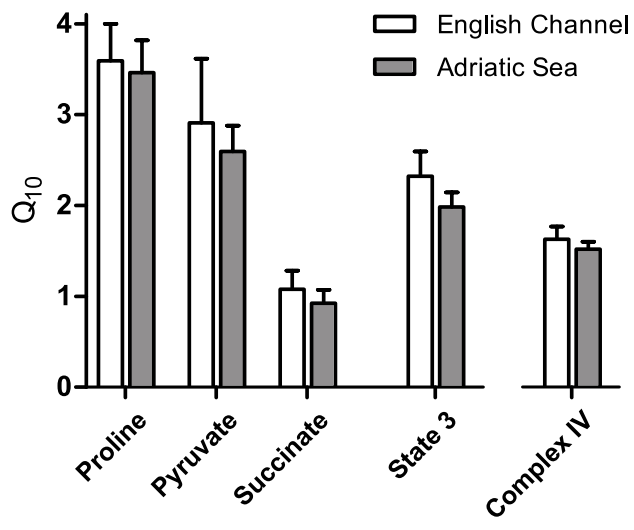

Figure 4

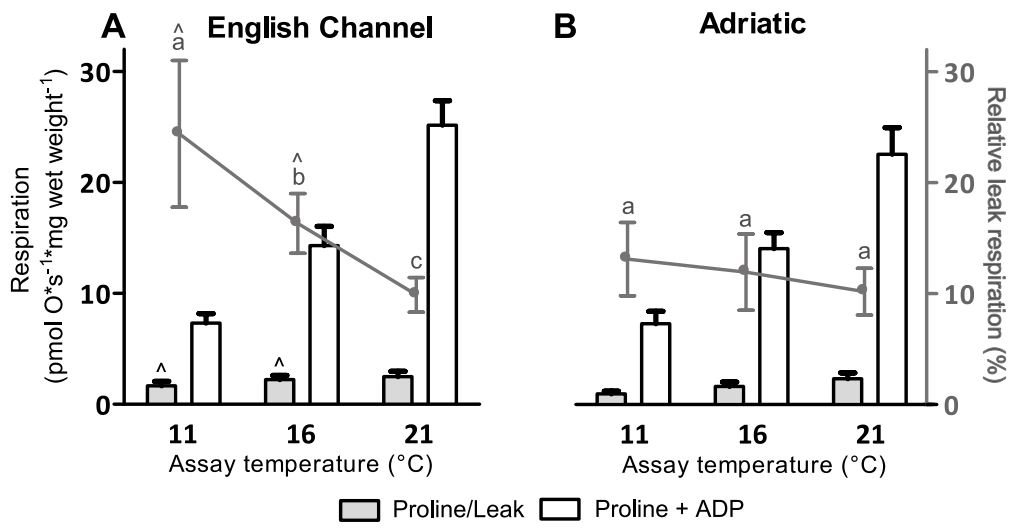

Figure 5

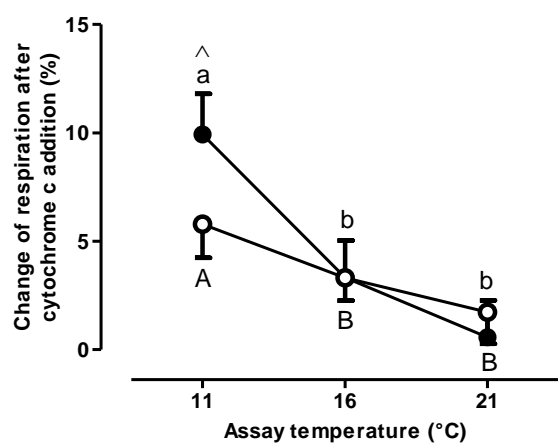

Table 1

| Enzyme                 | Heart type      | Systemic heart                |                               |                               | Branchial heart               |                               |                  |
|------------------------|-----------------|-------------------------------|-------------------------------|-------------------------------|-------------------------------|-------------------------------|------------------|
|                        |                 | Acclimation temperature (°C)  |                               |                               |                               |                               |                  |
|                        |                 | 11                            | 16                            | 21                            | 11                            | 16                            | 21               |
| Citrate synthase       | English Channel | 0.89 (0.82-0.96) <sup>a</sup> | 0.73 (0.65-0.82) <sup>b</sup> | 0.74 (0.60-0.88)              | 0.64 (0.51-0.77)              | 0.78 (0.67-0.89)              | 0.81 (0.74-0.88) |
|                        | Adriatic Sea    | 1.07 (0.53-1.63)              | 1.01 (0.80-1.22) <sup>▲</sup> | 0.81 (0.67-0.96)              | 0.63 (0.53-0.74)              | 0.64 (0.51-0.76)              | 0.78 (0.63-0.93) |
| Lactate dehydrogenase  | English Channel | 0.10 (0.07-0.14)              | 0.11 (0.09-0.12) <sup>a</sup> | 0.05 (0.04-0.07) <sup>b</sup> | 0.12 (0.10-0.14)              | 0.10 (0.09-0.12)              | 0.08 (0.06-0.10) |
|                        | Adriatic Sea    | 0.13 (0.08-0.19)              | 0.09 (0.05-0.13)              | 0.08 (0.07-0.10) <sup>▲</sup> | 0.07 (0.05-0.10) <sup>▼</sup> | 0.07 (0.06-0.09) <sup>▼</sup> | 0.06 (0.06-0.07) |
| Octopine dehydrogenase | English Channel | 0.40 (0.34-0.46) <sup>▲</sup> | 0.48 (0.43-0.53)              | 0.39 (0.29-0.48) <sup>▲</sup> | 0.22 (0.17-0.27)              | 0.24 (0.20-0.27)              | 0.23 (0.20-0.26) |
|                        | Adriatic Sea    | 0.56 (0.46-0.66)              | 0.57 (0.35-0.80)              | 0.62 (0.49-0.75)              | 0.26 (0.18-0.33)              | 0.23 (0.18-0.29)              | 0.28 (0.23-0.34) |

Values are means with 95% C.I. in parentheses.  $N = 5-17$

▲/▼ indicate significant differences ( $P < 0.05$ ) between populations and unequal letters between acclimation temperatures
